# Supplementary material
Source: Springer Nature journal article supplement (https://www.springermedizin.de/resource/supplementary/13075_2012_3880_MOESM1_ESM.pdf/9695544)

### Reliability of mSASSS Progression Scores

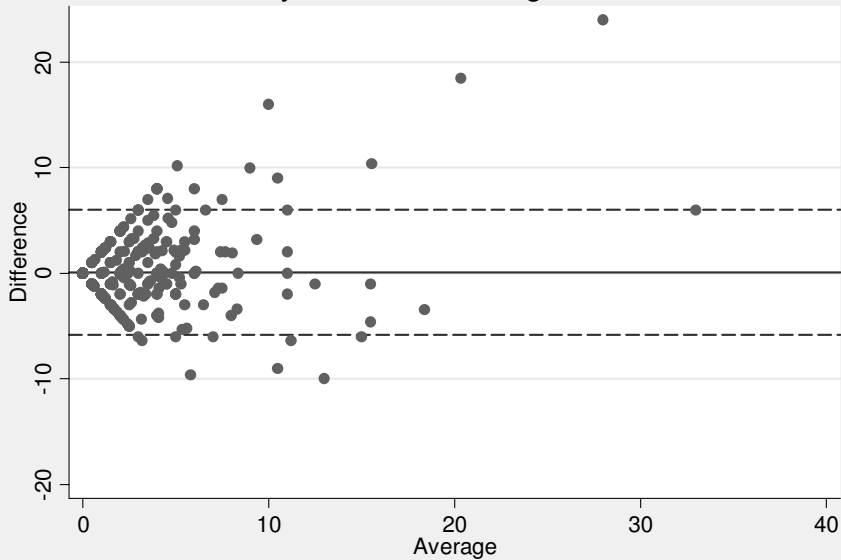

### Reliability of RASSS Progression Scores

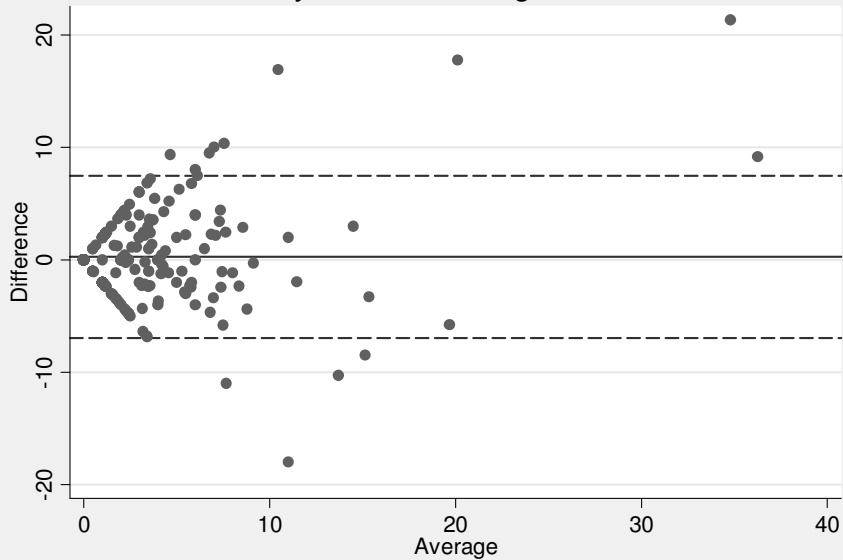

Supplement: MOESM1 [file 9695544]
